# Supplementary material for: Ruler elements in chromatin remodelers set nucleosome array spacing and phasing
Source: Springer Nature journal article supplement (doi:10.1038/s41467-021-23015-0), 2021-05-28
Supplement: MOESM2 [file 41467_2021_23015_MOESM2_ESM.pdf]

## **Description of Additional Supplementary Files**

File Name: Supplementary Data 1

Description: Summary of experimental details for each reconstituted chromatin sample used in this study. Each replicate is based on an individually assembled SGD chromatin prepared on a different day. The processed data files can be downloaded at GEO (GSE140614).
